# Supplementary material for: An efficient synthesis of 1,6-anhydro-N-acetylmuramic acid from N-acetylglucosamine
Source: PubMed Central journal article supplement (PMC5753053; doi:10.3762/bjoc.13.261), 2017-12-11
Supplement: Beilstein_J_Org_Chem-13-2631-s001.pdf [file Beilstein_J_Org_Chem-13-2631-s001.pdf]

# Supporting Information

for

## An efficient synthesis of 1,6-anhydro-*N*-acetylmuramic acid from *N*-acetylglucosamine

Matthew B. Calvert<sup>1,2</sup>, Christoph Mayer<sup>3</sup>, Alexander Titz<sup>1,2,4\*</sup>

Address: <sup>1</sup>Chemical Biology of Carbohydrates, Helmholtz Institute for Pharmaceutical Research Saarland (HIPS), D-66123 Saarbrücken, Germany, <sup>2</sup>Deutsches Zentrum für Infektionsforschung (DZIF), Standort Hannover-Braunschweig, Germany, <sup>3</sup>Interfaculty Institute of Microbiology and Infection Medicine Tübingen (IMIT), Department of Microbiology and Biotechnology, University of Tübingen, Germany and <sup>4</sup>Department of Pharmacy, Saarland University, Saarbrücken, Germany

Email: Alexander Titz - [alexander.titz@helmholtz-hzi.de](mailto:alexander.titz@helmholtz-hzi.de) \*Corresponding author

### Contents

|                                                                                                           |     |
|-----------------------------------------------------------------------------------------------------------|-----|
| Table of Contents                                                                                         | S1  |
| <b>Confirming the reported structure of 12</b>                                                            | S2  |
| <sup>1</sup> H NMR data for <b>12</b> in CDCl <sub>3</sub> , table of observed and reported proton shifts | S2  |
| HMBC data for <b>12</b> (acetone- <i>d</i> <sub>6</sub> ) with key correlations indicated                 | S3  |
| NOESY data for <b>12</b> (acetone- <i>d</i> <sub>6</sub> ) with key correlations indicated                | S4  |
| <b><sup>1</sup>H and <sup>13</sup>C NMR data</b>                                                          | S5  |
| <sup>1</sup> H NMR data for <b>12</b>                                                                     | S5  |
| <sup>13</sup> C NMR data for <b>12</b>                                                                    | S6  |
| <sup>1</sup> H NMR data for <b>13</b>                                                                     | S7  |
| <sup>13</sup> C NMR data for <b>13</b>                                                                    | S8  |
| <sup>1</sup> H NMR data for <b>1</b>                                                                      | S9  |
| <sup>13</sup> C NMR data for <b>1</b>                                                                     | S10 |
| <sup>1</sup> H NMR data for <b>5</b>                                                                      | S11 |
| <sup>13</sup> C NMR data for <b>5</b>                                                                     | S12 |

## Confirming the reported structure of **12**

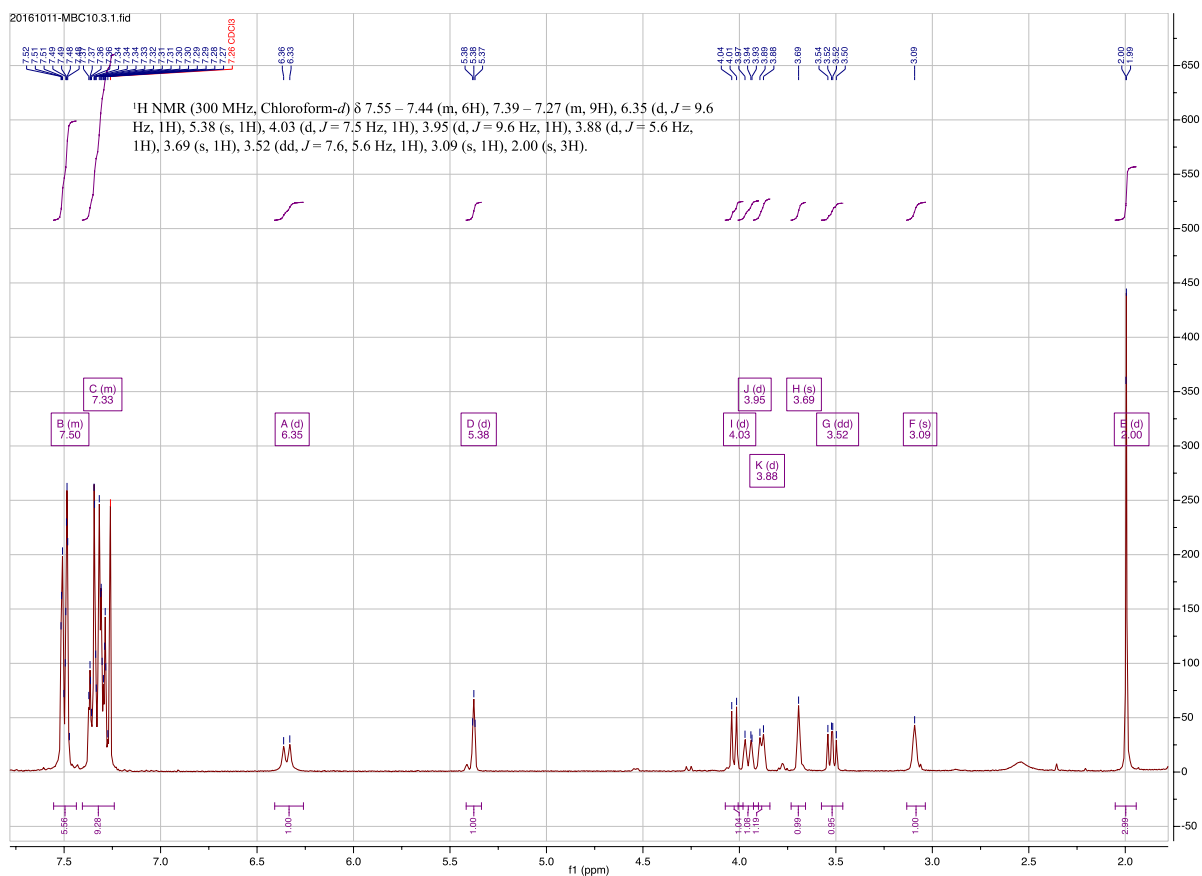

|      | Observed  | Reported  |
|------|-----------|-----------|
| H-1  | 5.38      | 5.40      |
| H-2  | 3.95      | 3.973     |
| H-3  | 3.09      | 3.080     |
| H-4  | 3.69      | 3.705     |
| H-5  | 3.88      | 3.910     |
| H-6a | 4.03      | 4.350     |
| H-6b | 3.52      | 3.538     |
| NHAc | 6.35      | 6.350     |
| Ac   | 2.00      | 2.198     |
| Ar   | 7.27-7.55 | 7.28-7.55 |

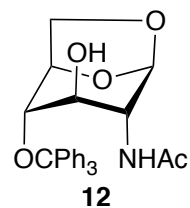

<sup>1</sup>H NMR data for **12** (CDCl<sub>3</sub>); Literature data from Tyrtys, T. V.; Byramova, N. E.; Bovin, N. V. *Russian Journal of Bioorganic Chemistry*, **2000**, 26, 414-418.

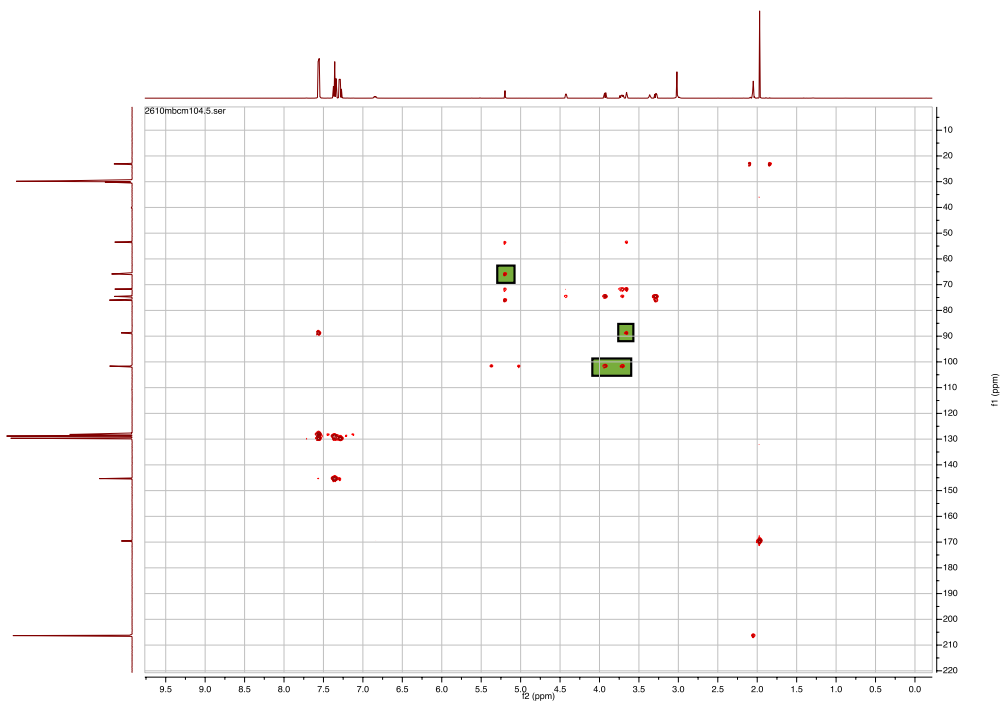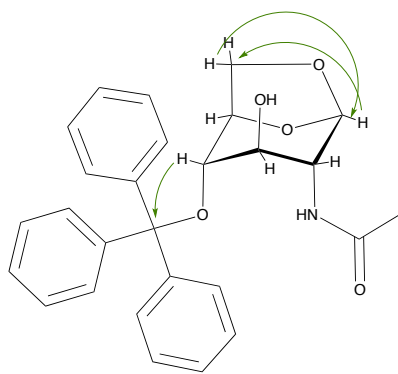

HMBC

HMBC spectrum for **12** with key correlations indicated on spectrum and structure

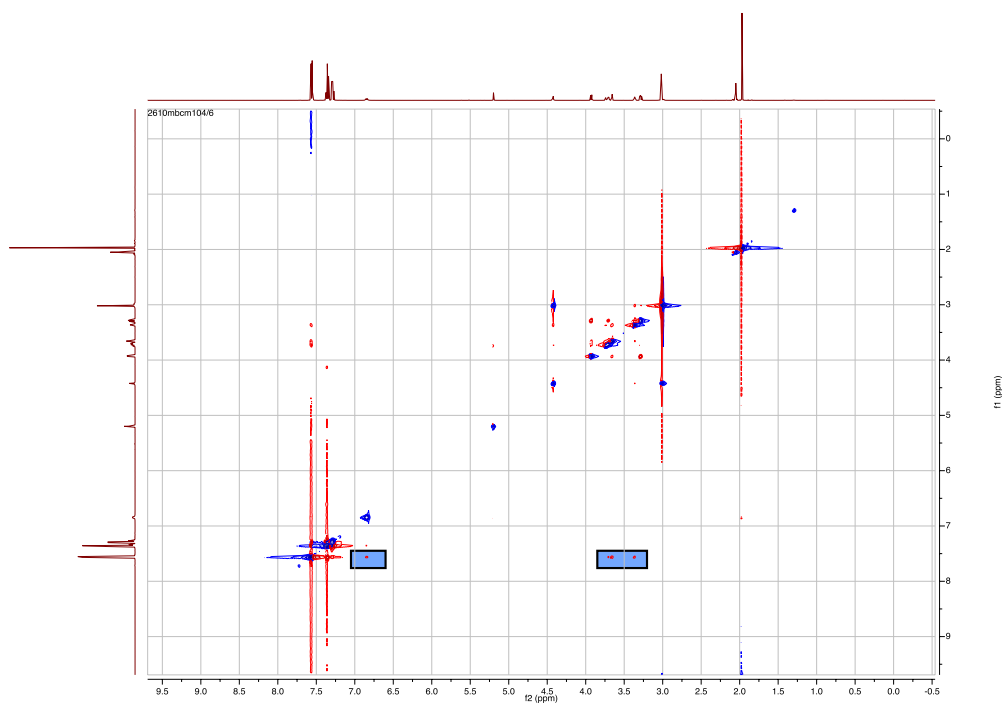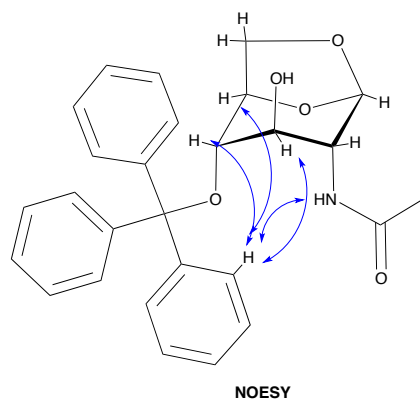

NOESY spectrum for **12** with key correlations indicated on spectrum and structure

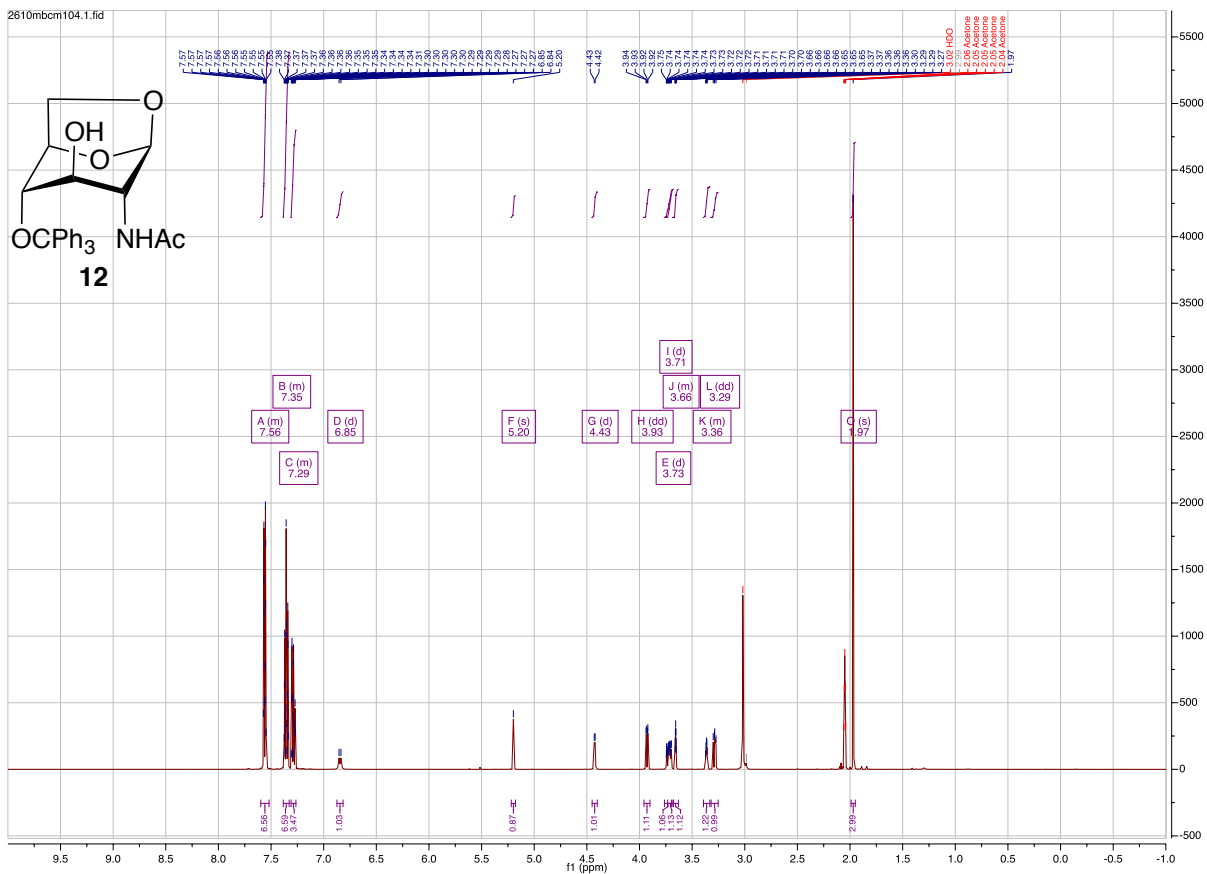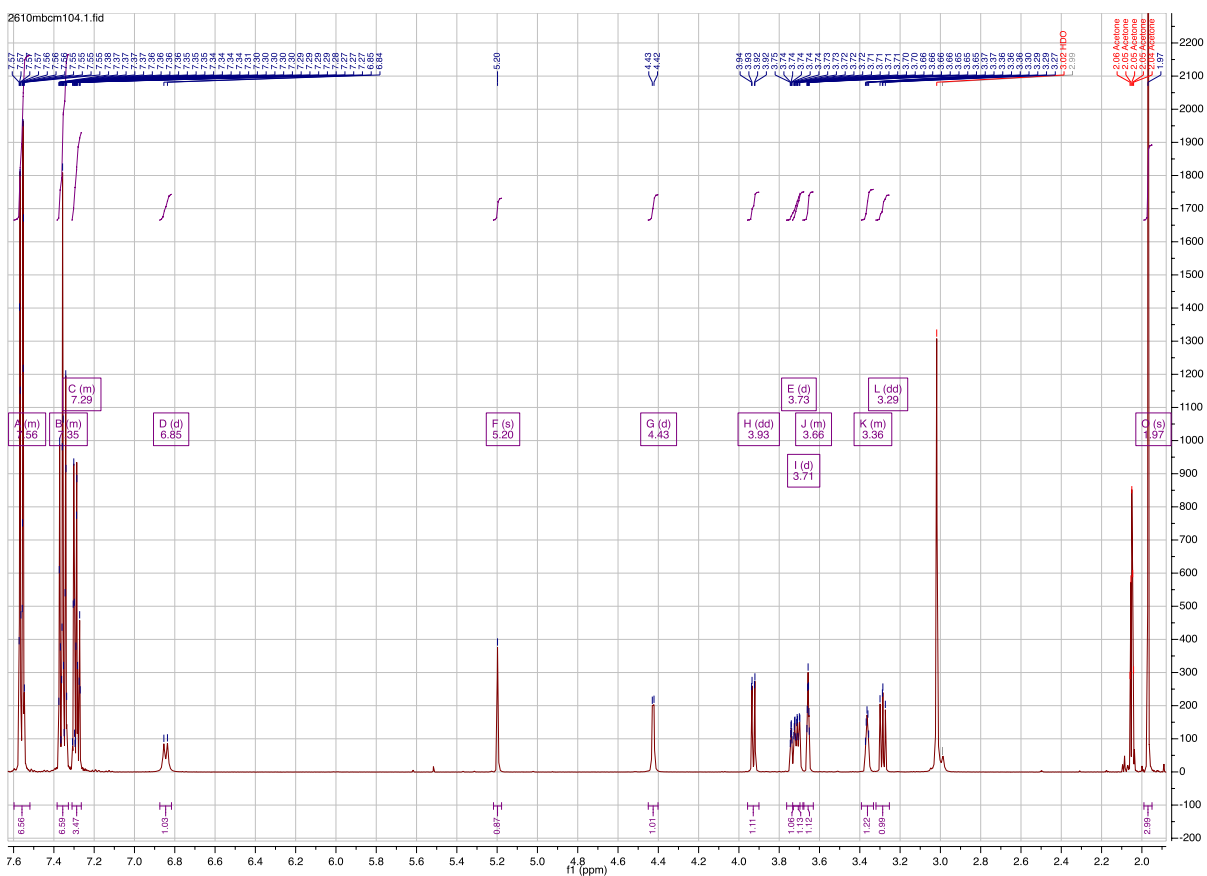

$^1\text{H}$  NMR data for **12**

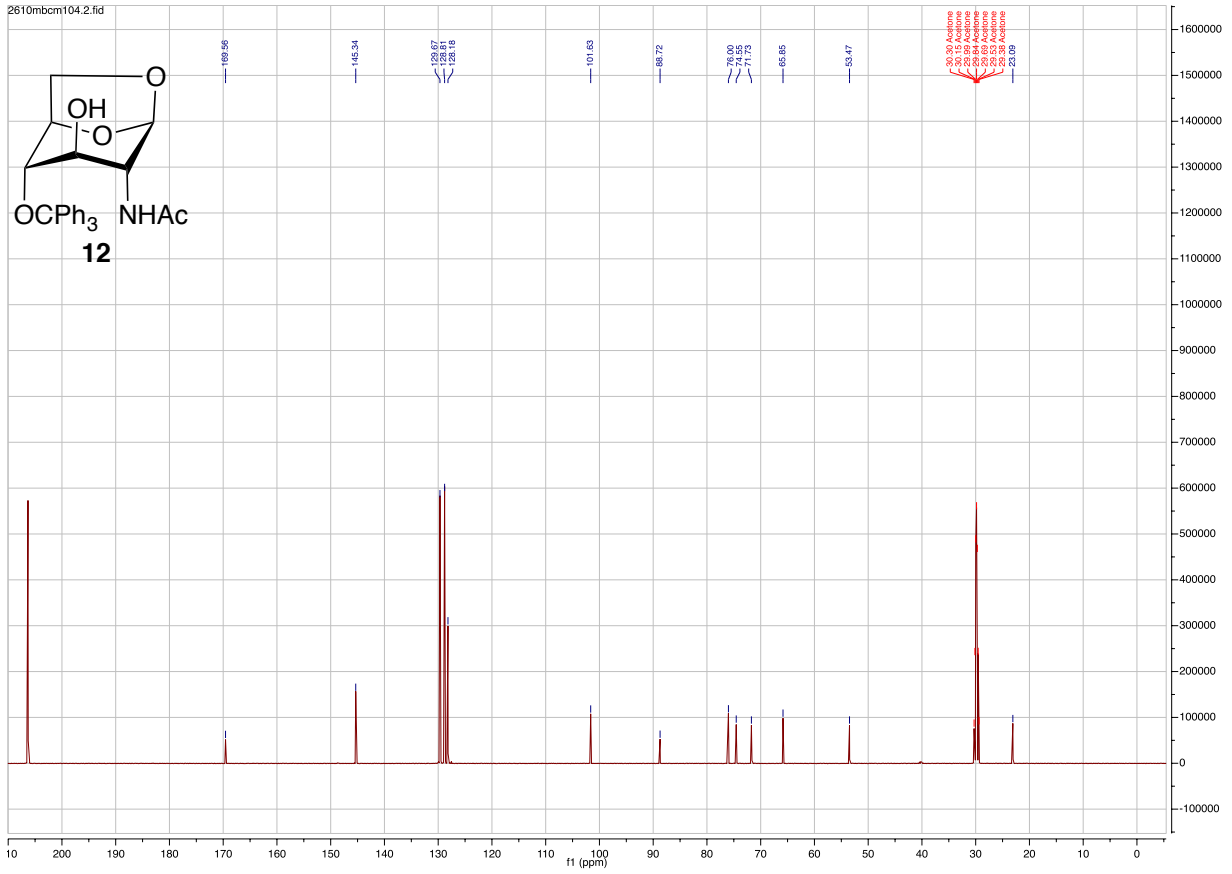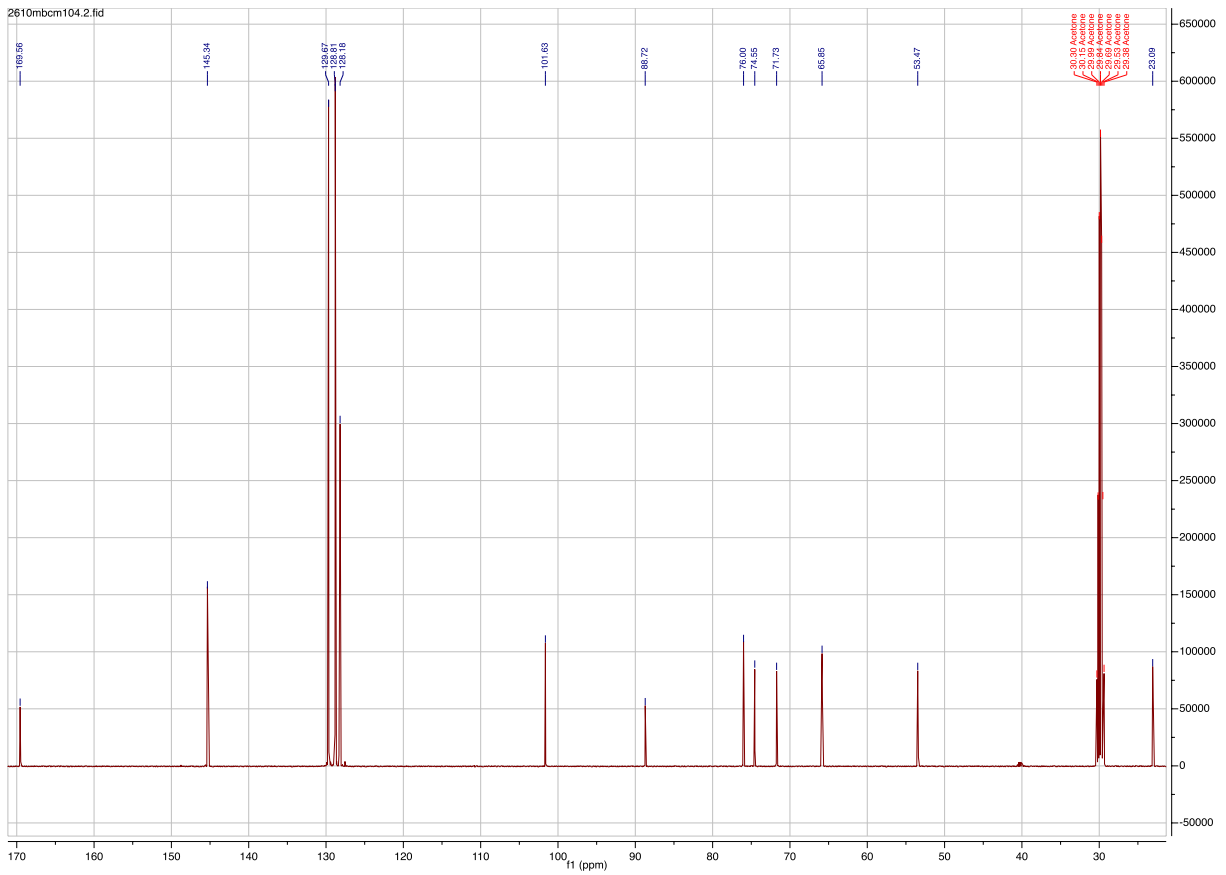

<sup>13</sup>C NMR data for **12**

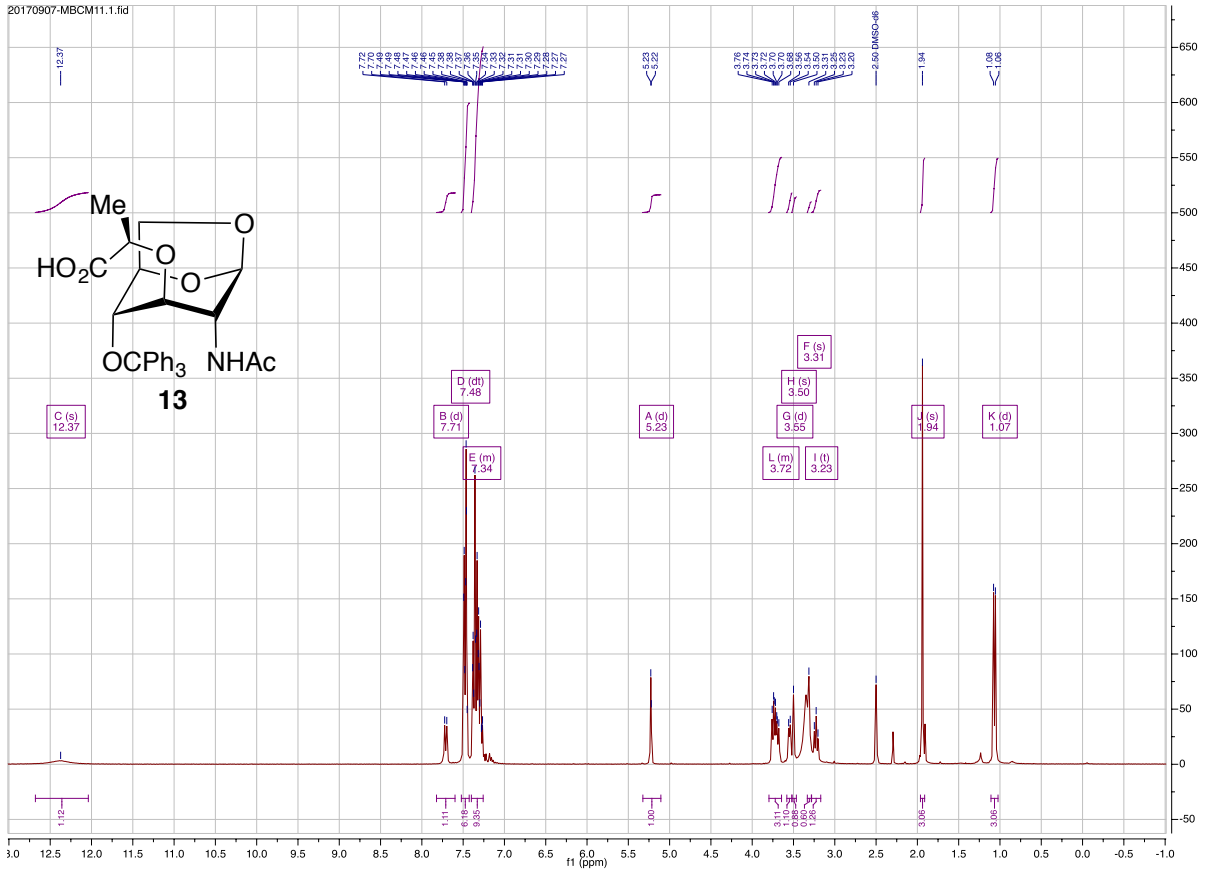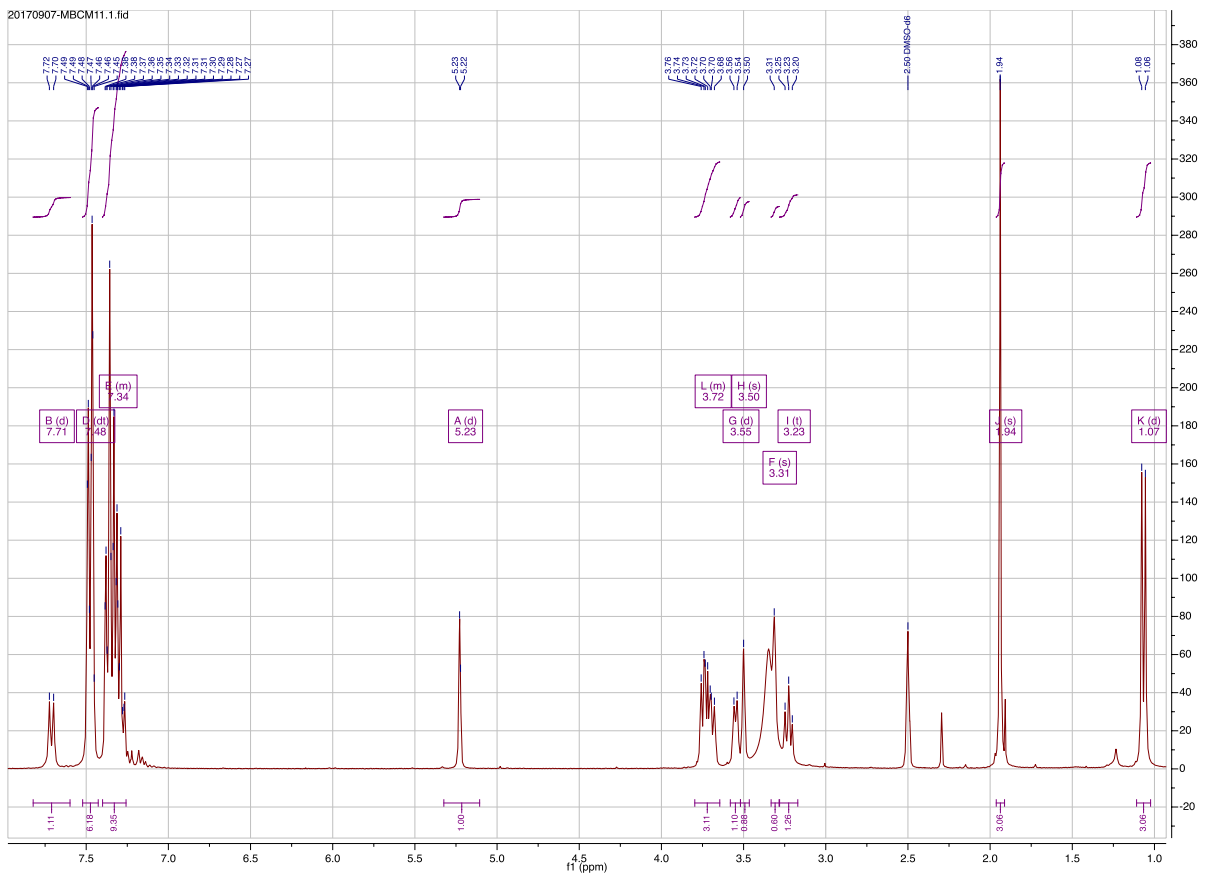

<sup>1</sup>H NMR data for **13**

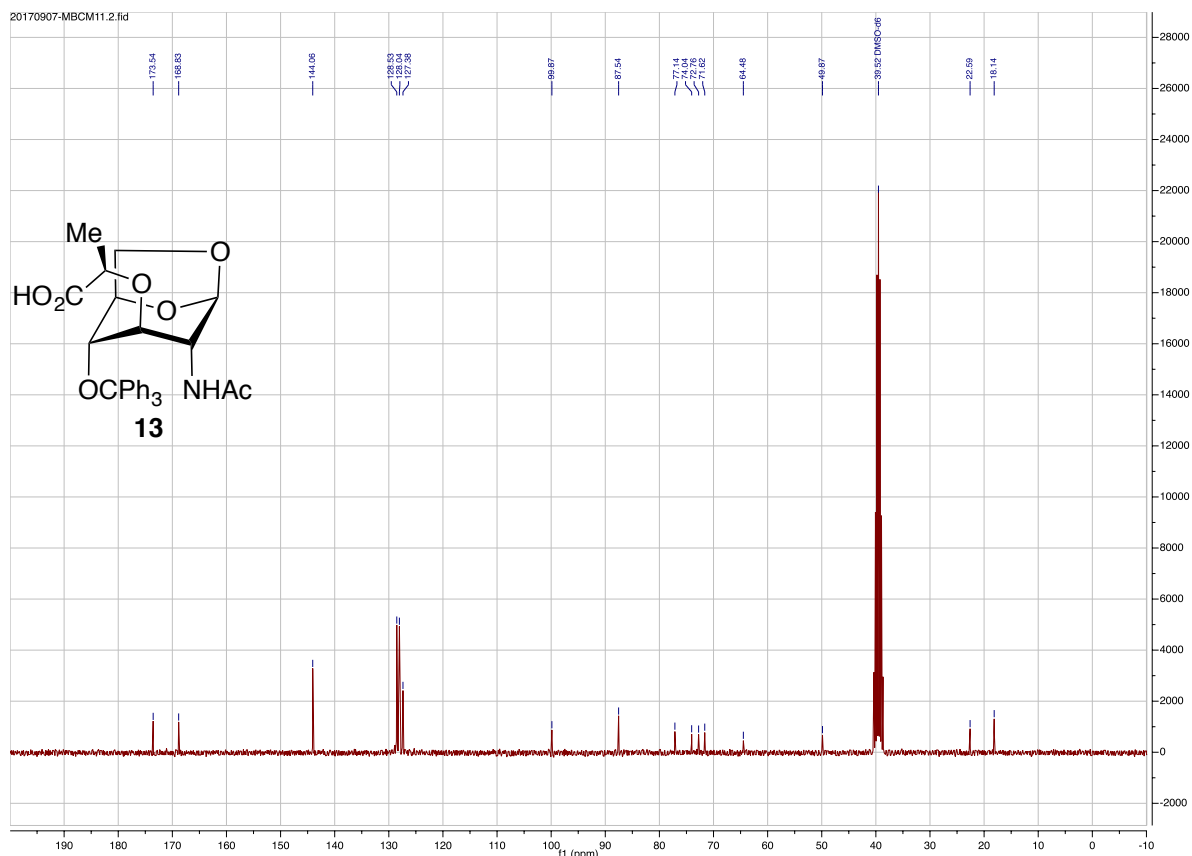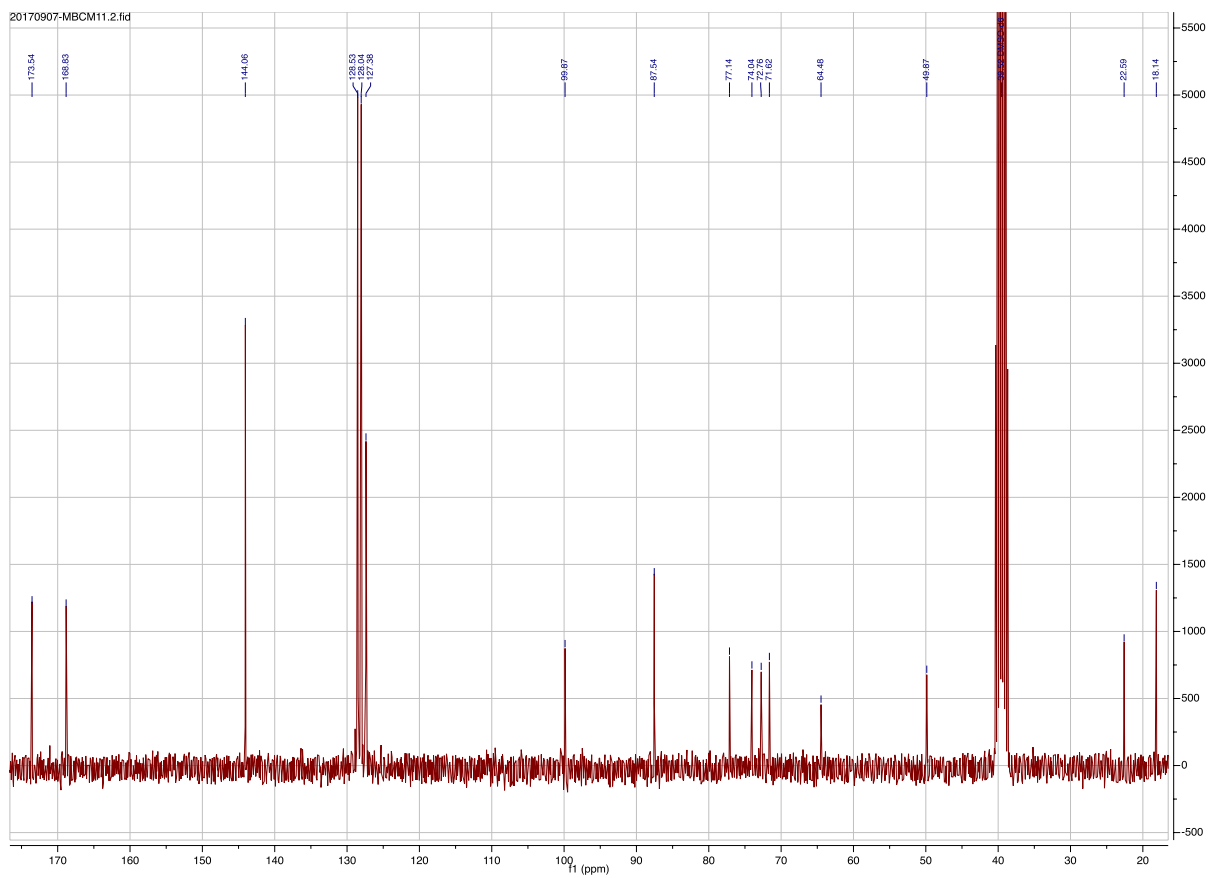

<sup>13</sup>C NMR data for **13**



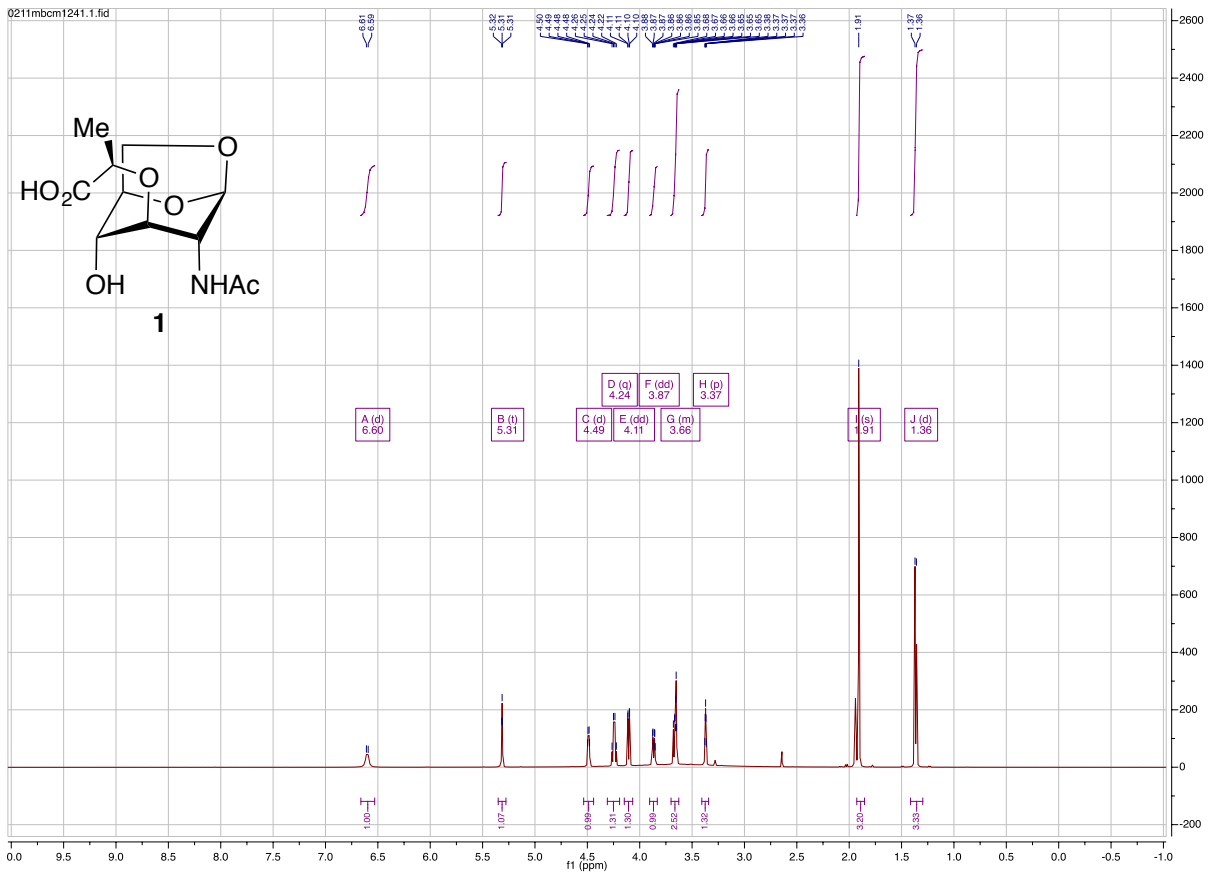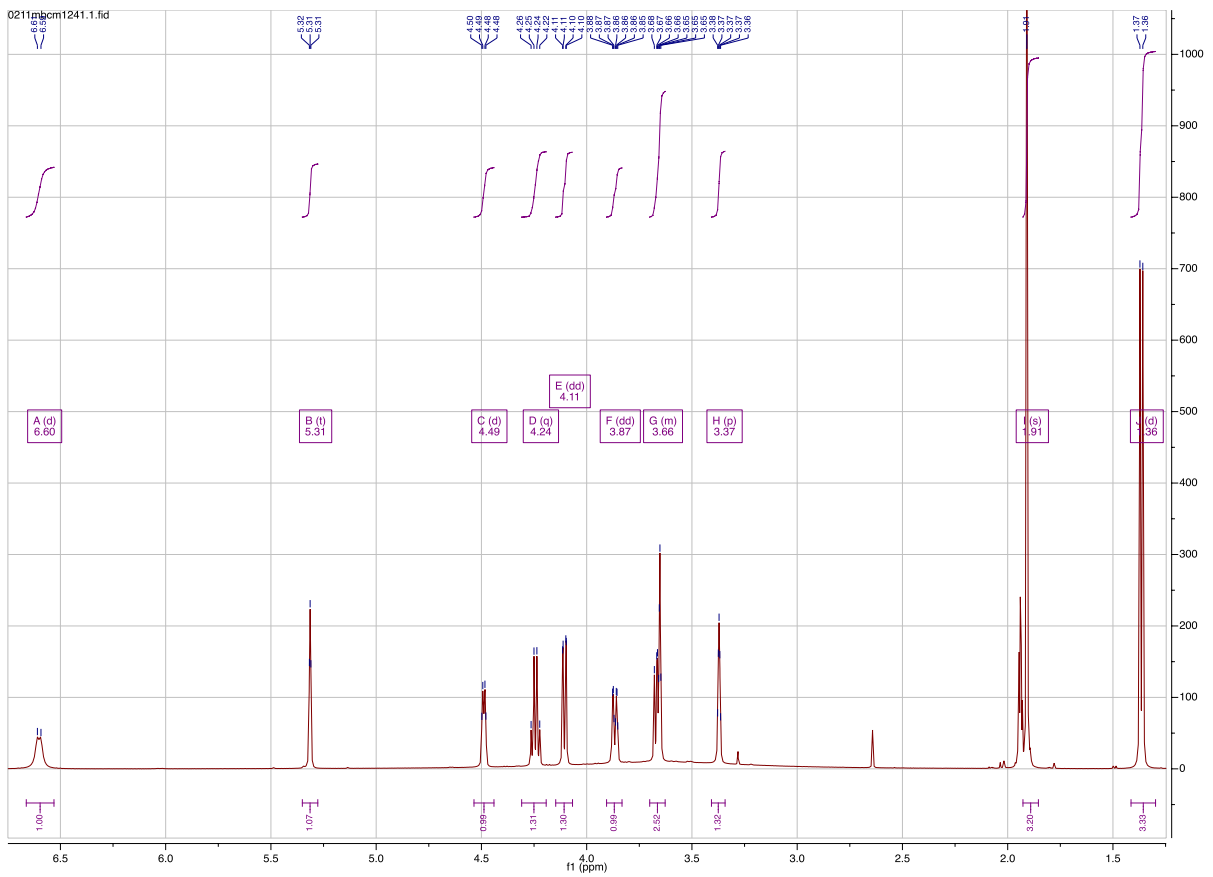

<sup>1</sup>H NMR data for **1**

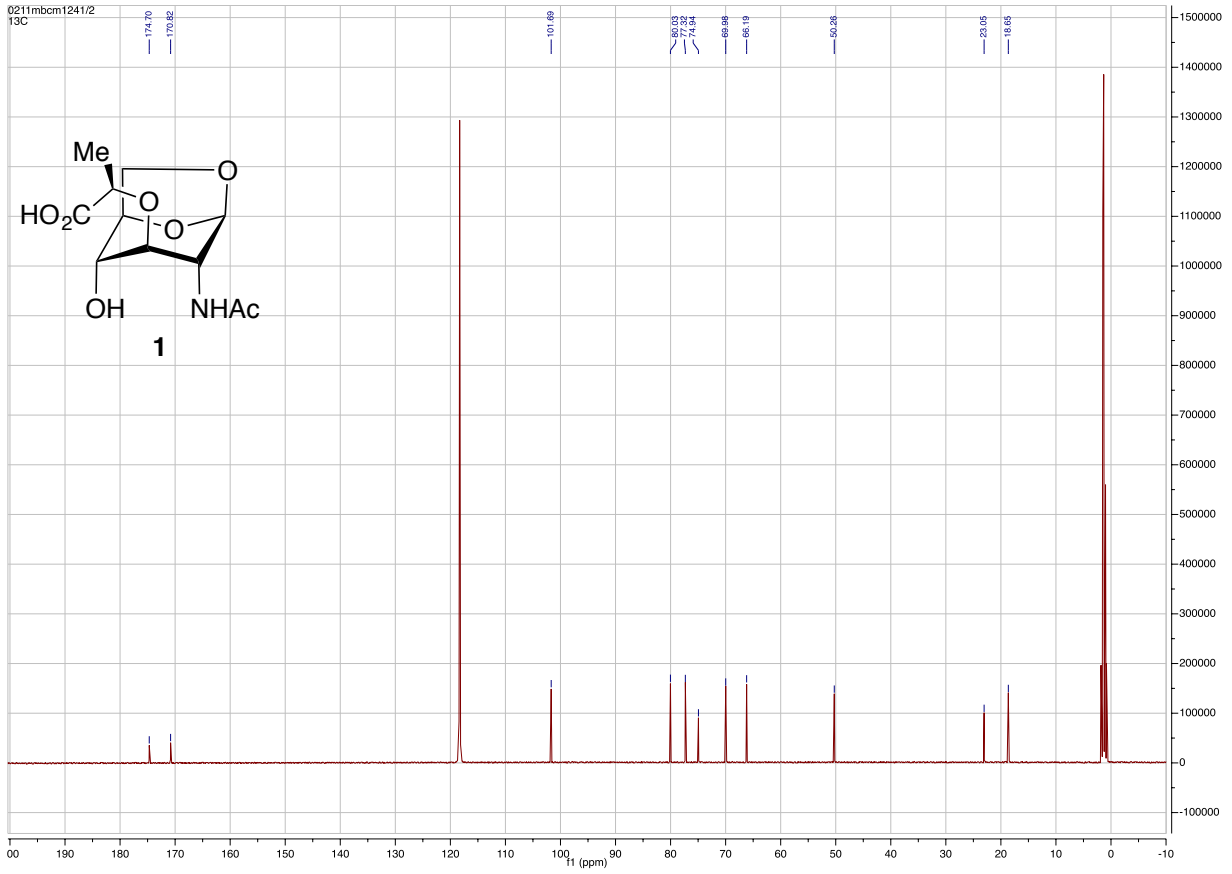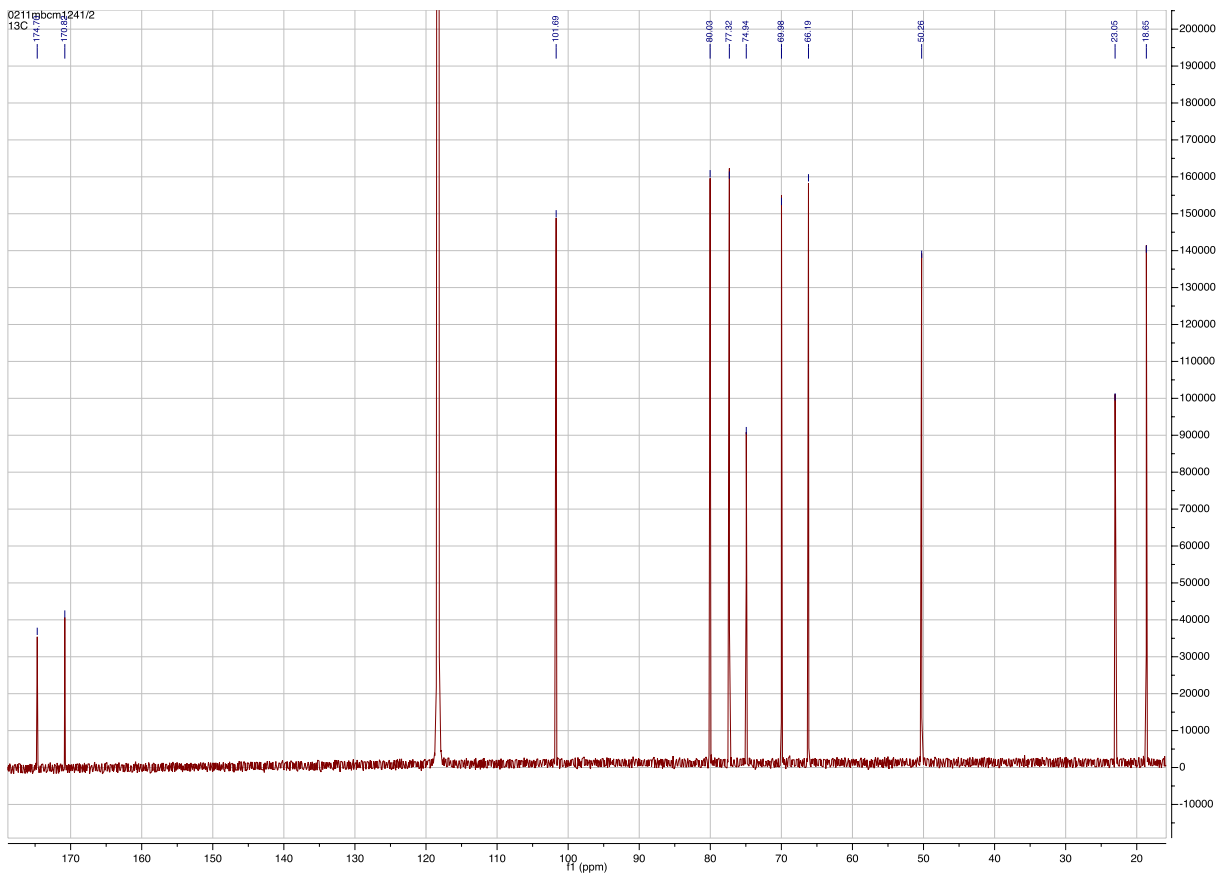

<sup>13</sup>C NMR data for **1**

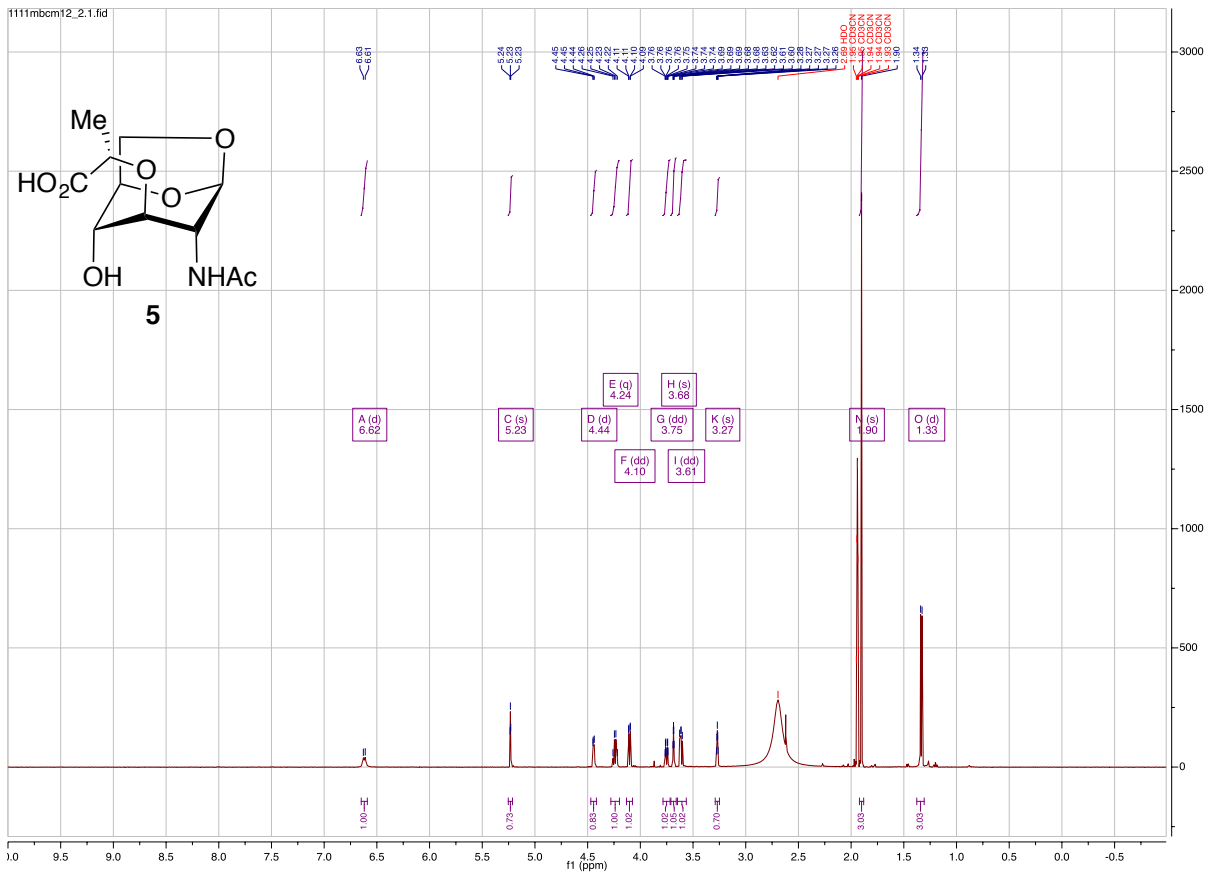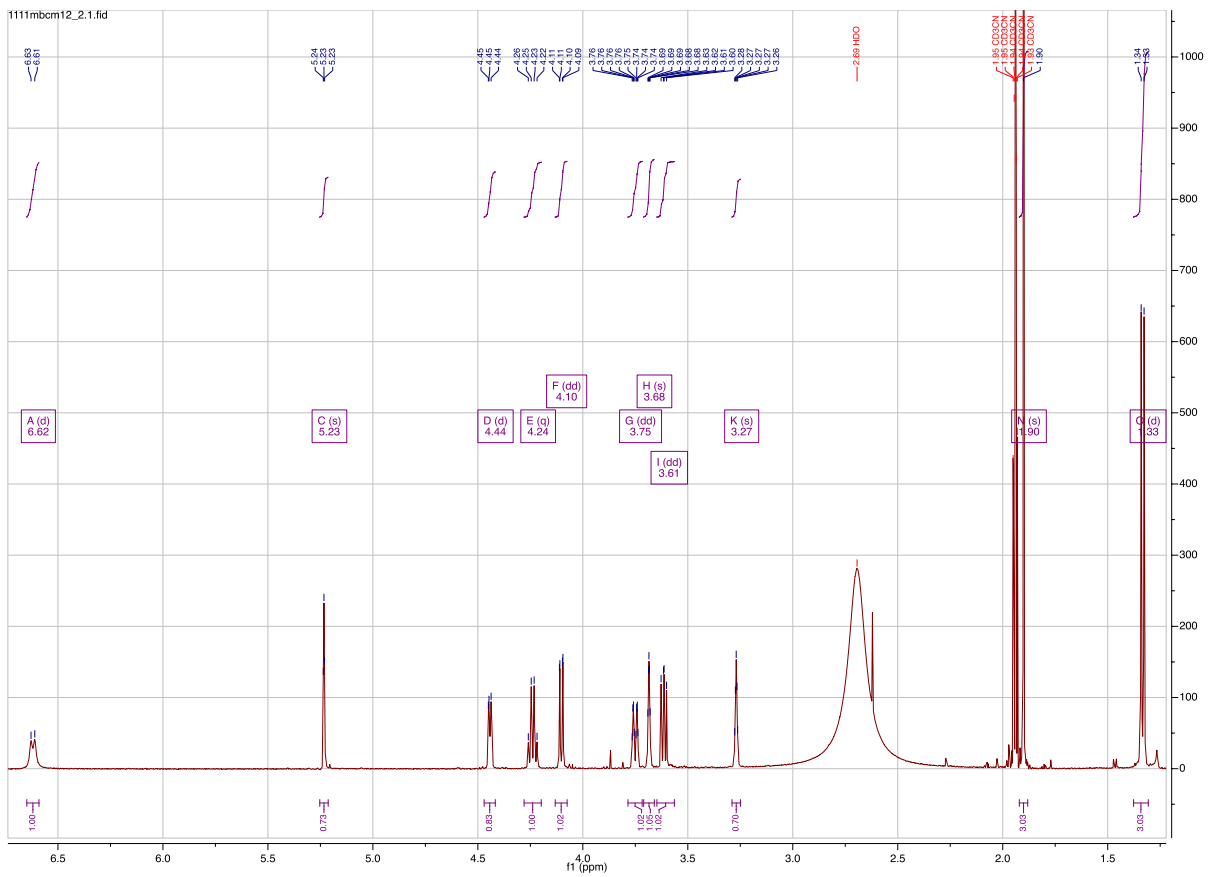

<sup>1</sup>H NMR data for **5**

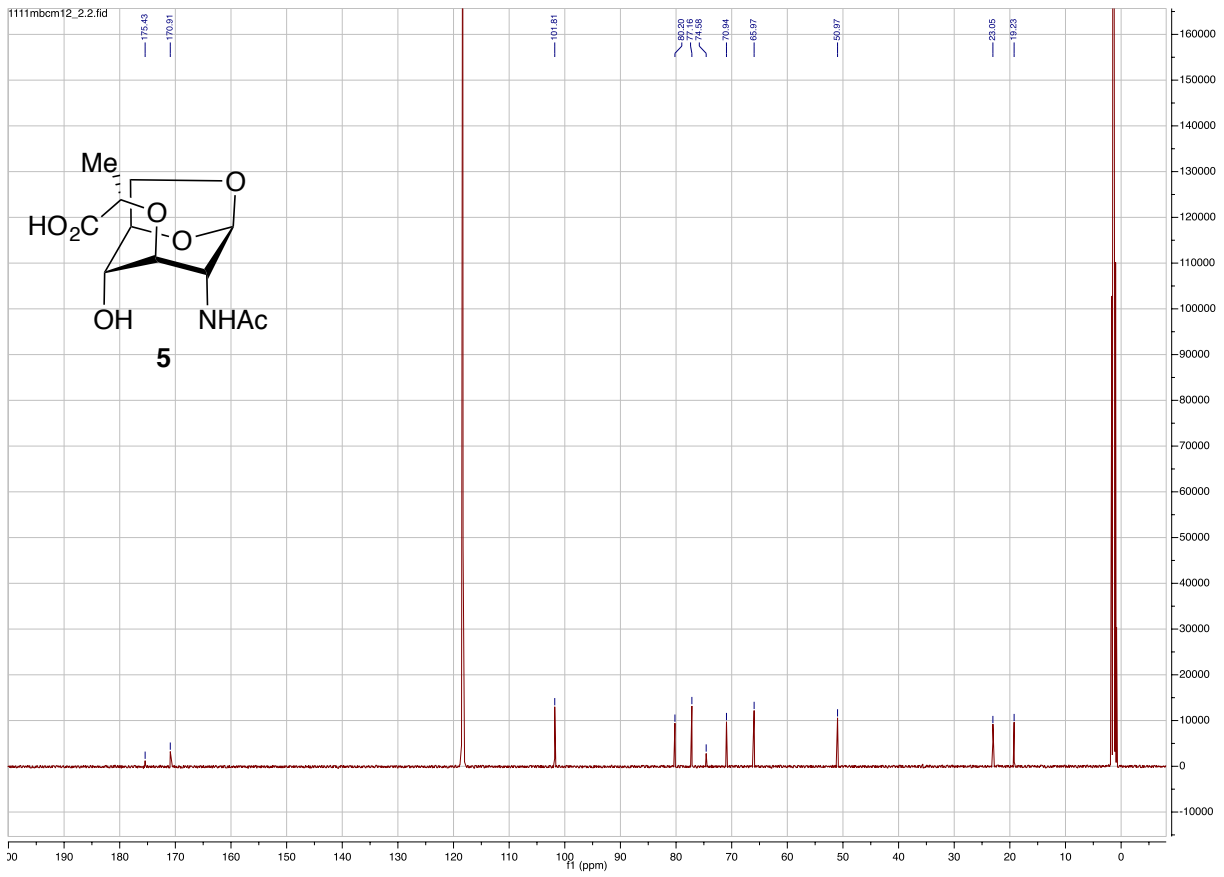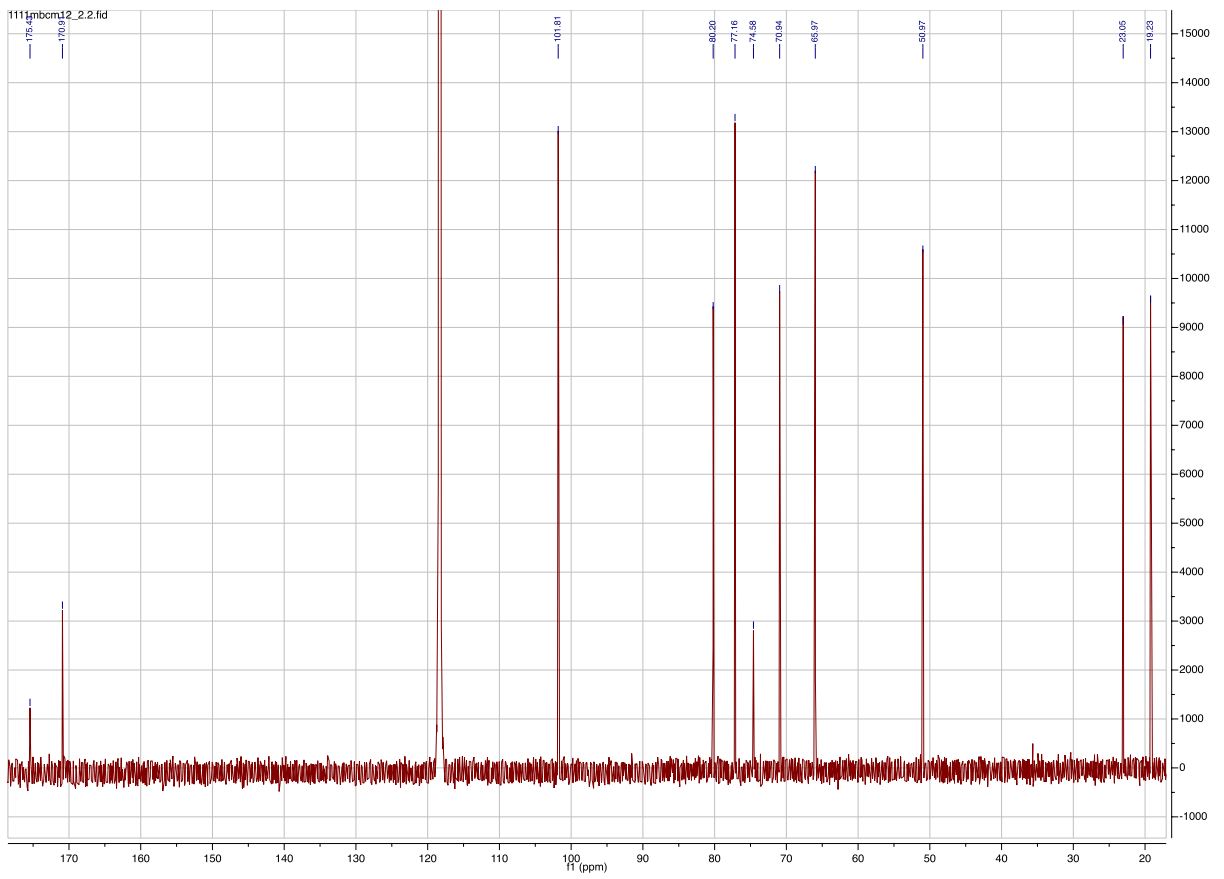

$^{13}\text{C}$  NMR data for **5**
